# Supplementary figures and images for: Long noncoding RNA-mediated maintenance of DNA methylation and transcriptional gene silencing
Source: Oxford University Press journal article supplement (doi:10.1242/dev.079566), 2012-06-22

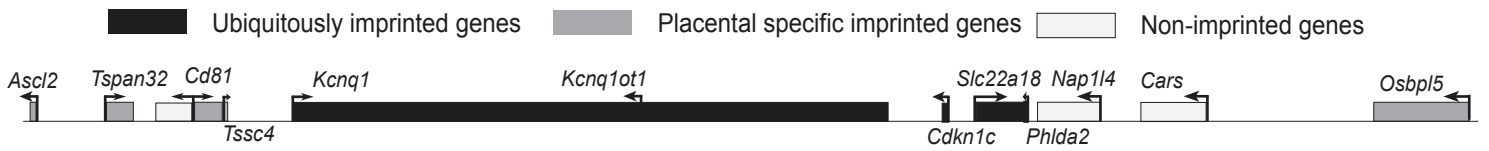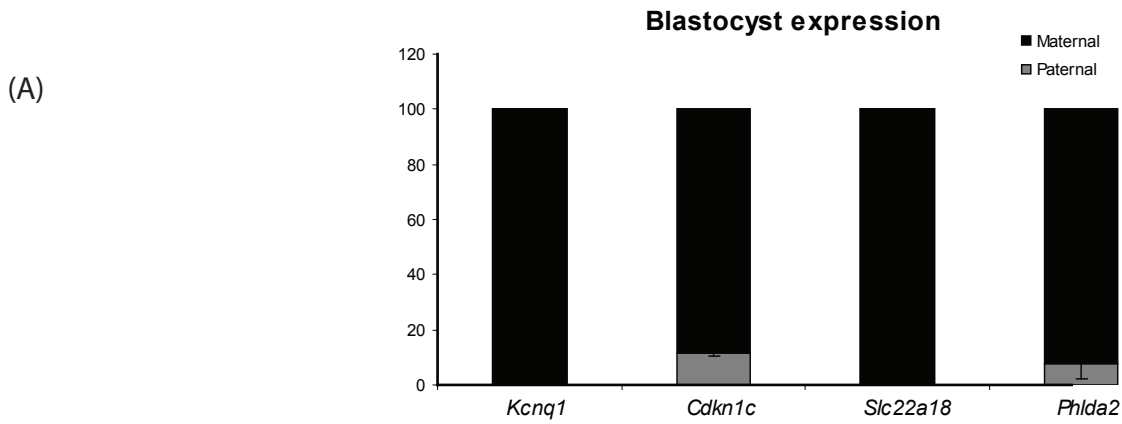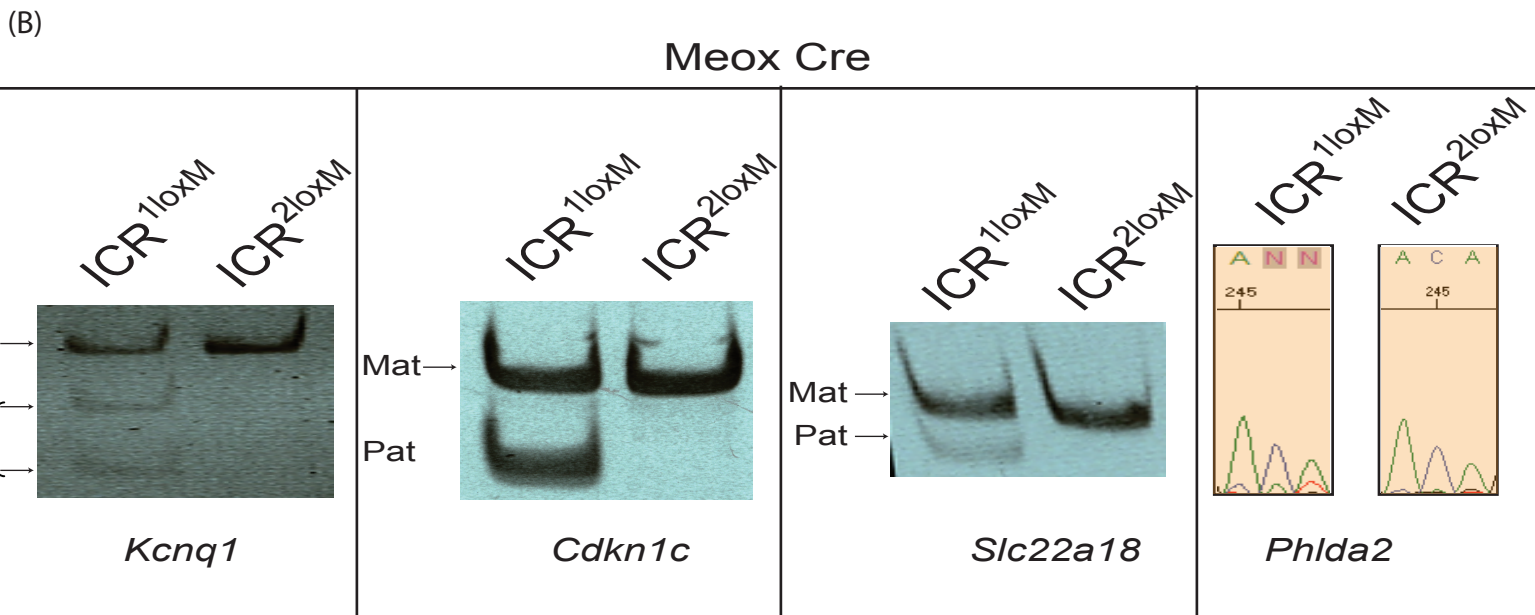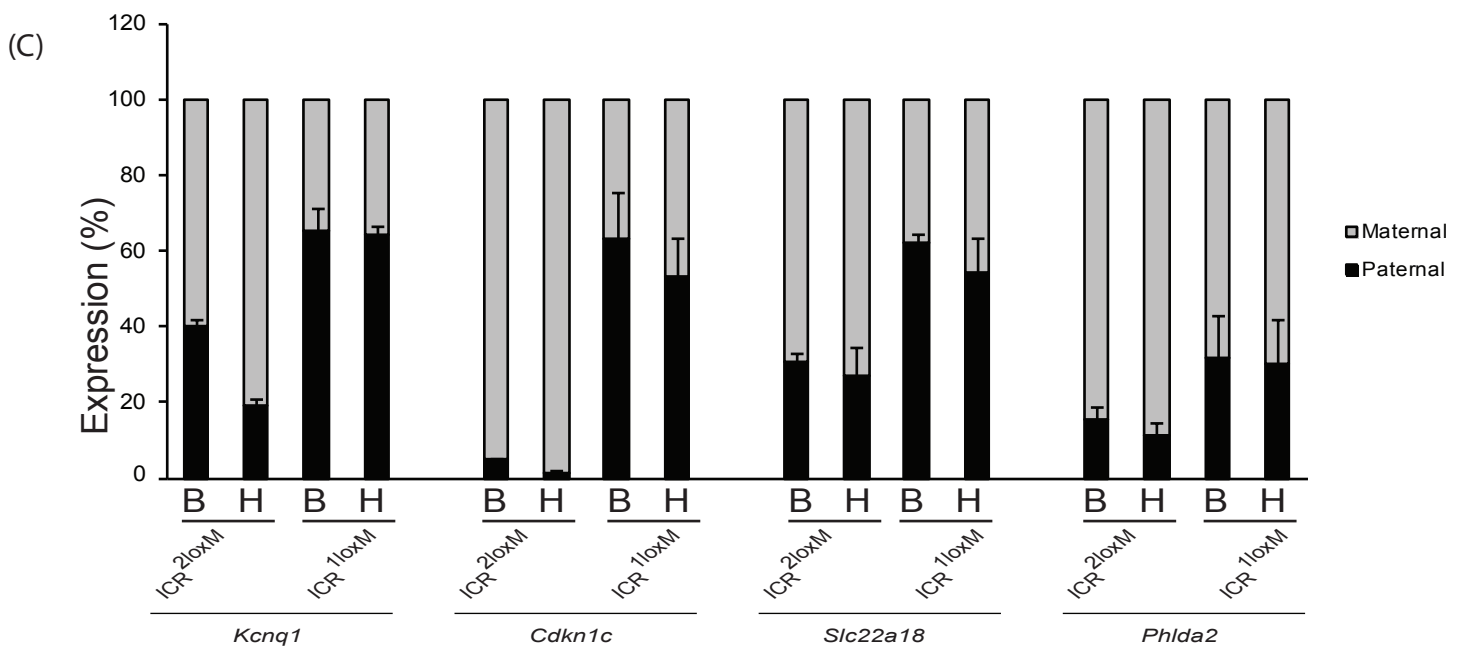

Supplement: dev079566figs1.pdf [file dev079566figs1.pdf]

(A)

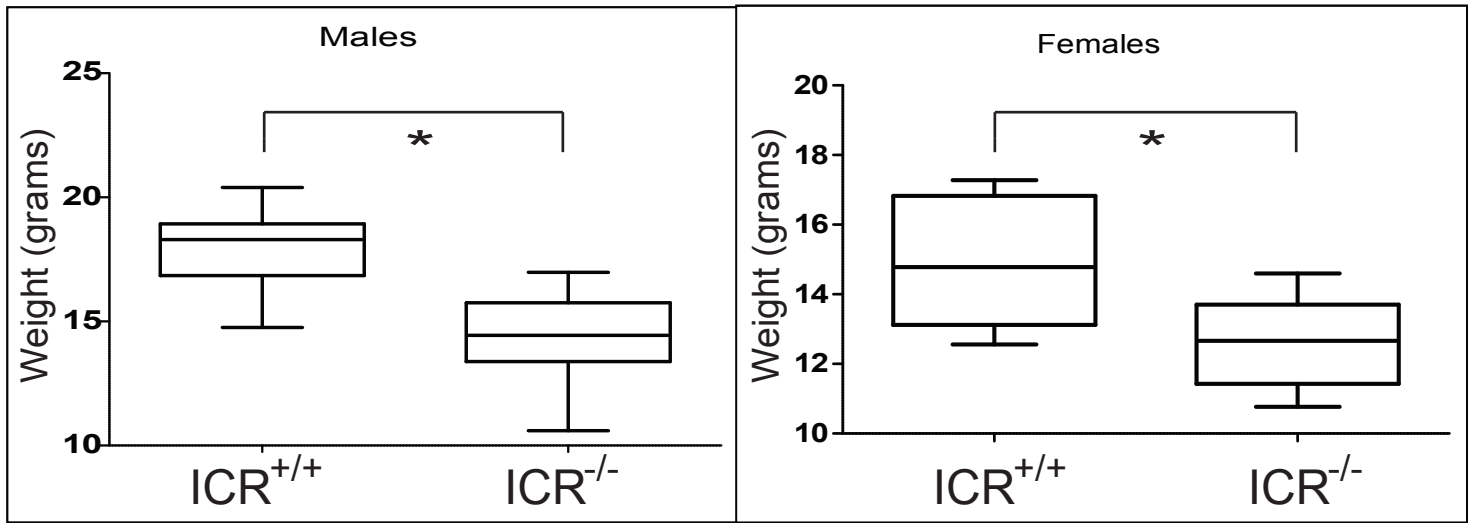

(B)

*Cdkn1c*

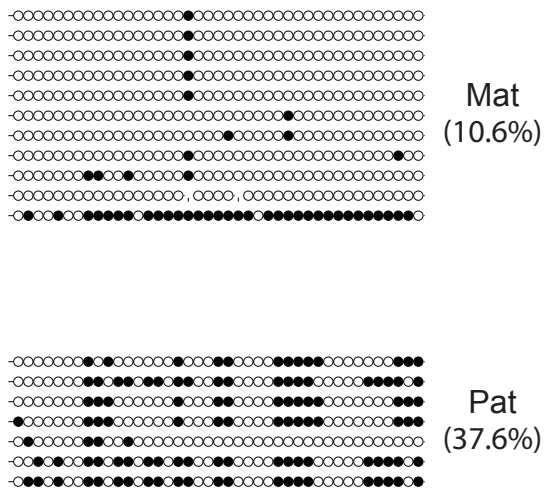

(C)

*Slc22a18*

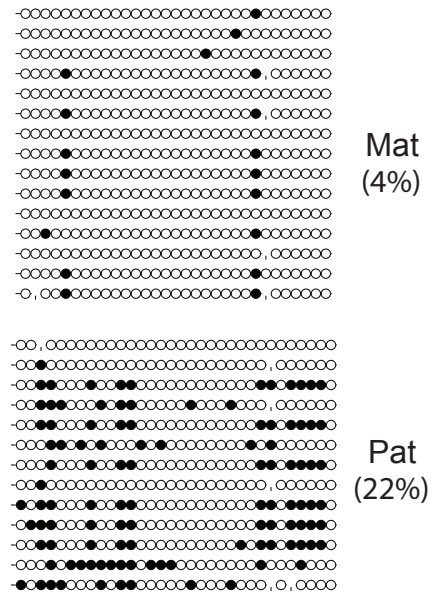

(D)

CAG Cre

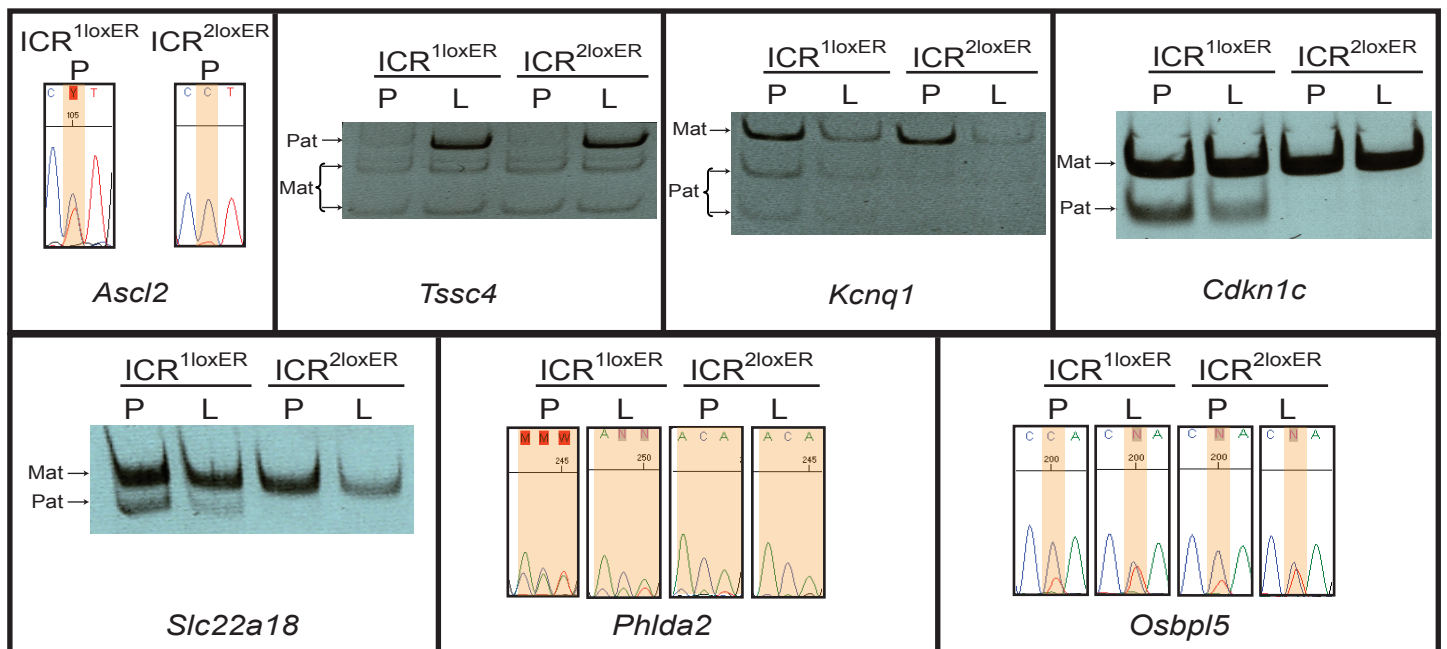

Supplement: dev079566figs2.pdf [file dev079566figs2.pdf]

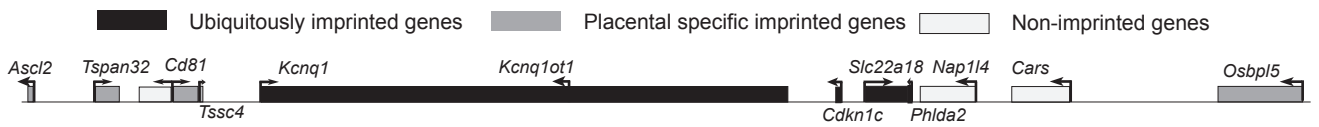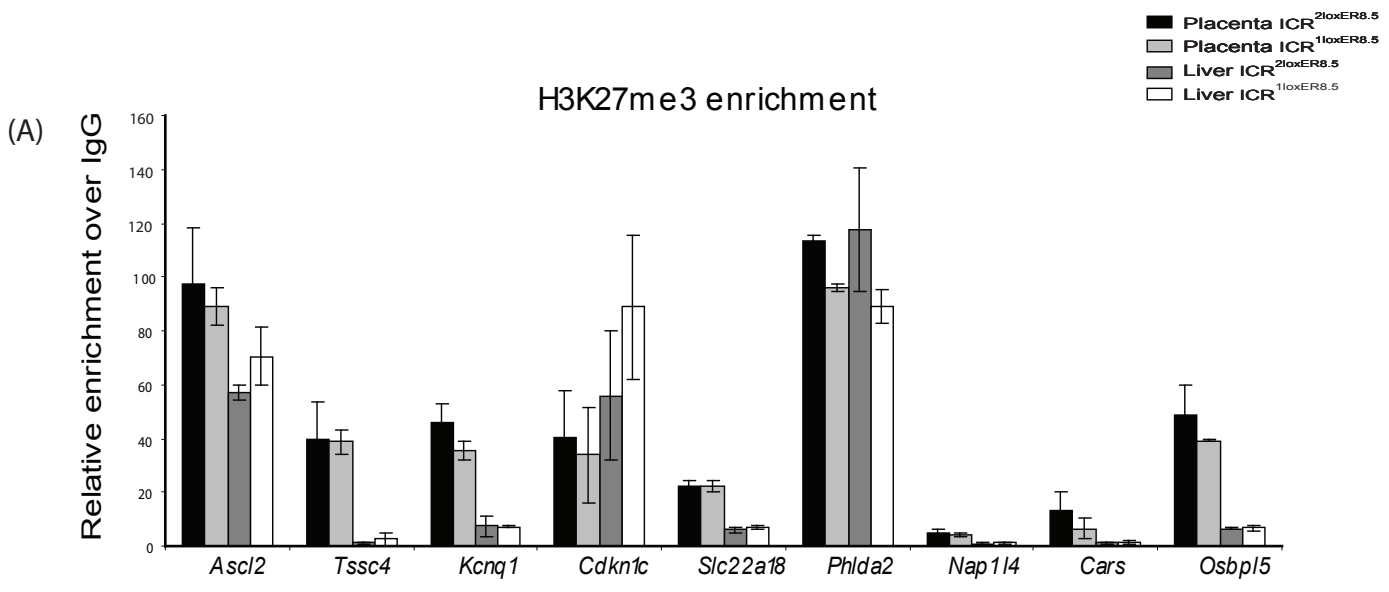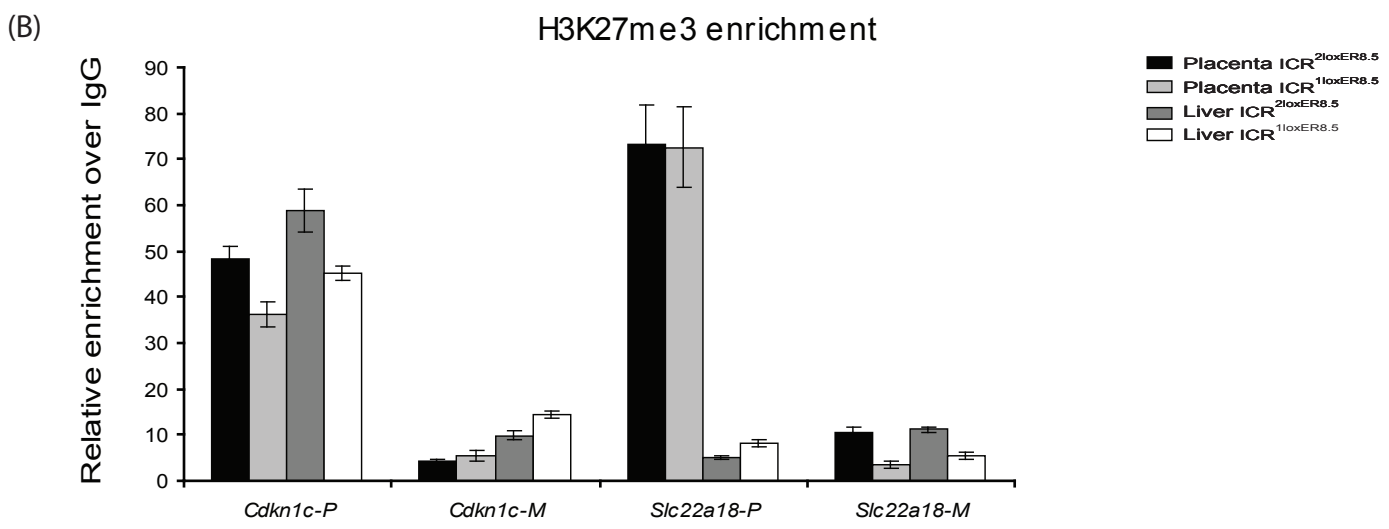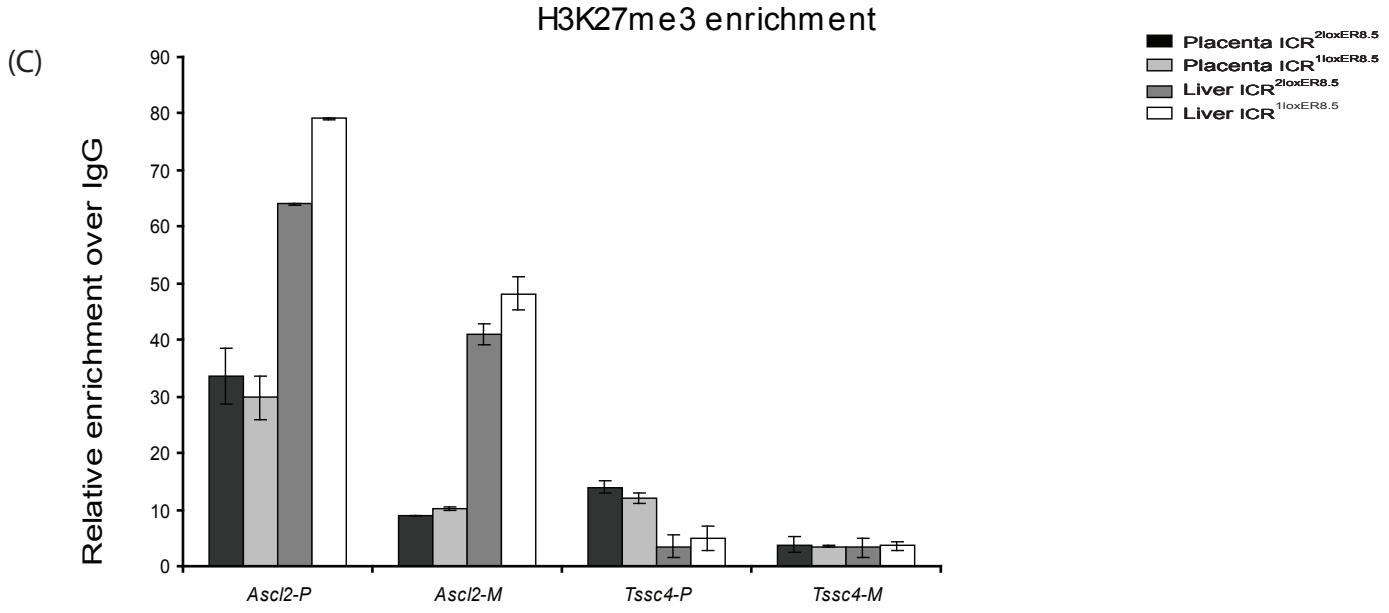

Supplement: dev079566figs3.pdf [file dev079566figs3.pdf]

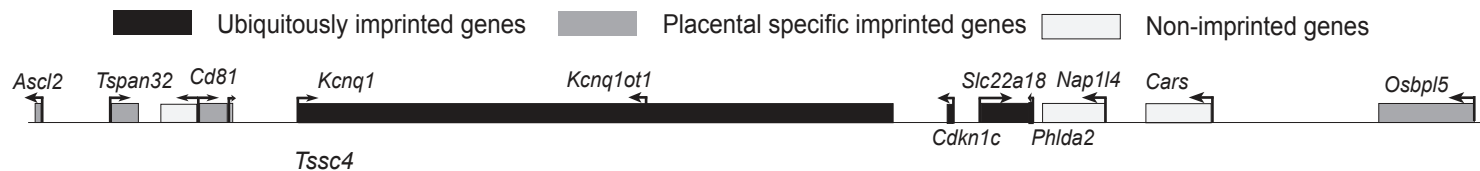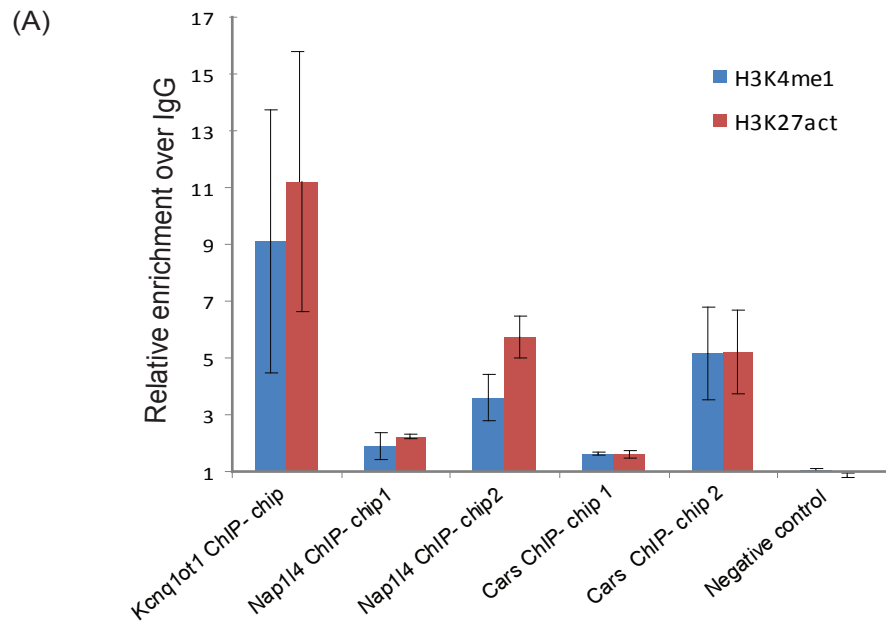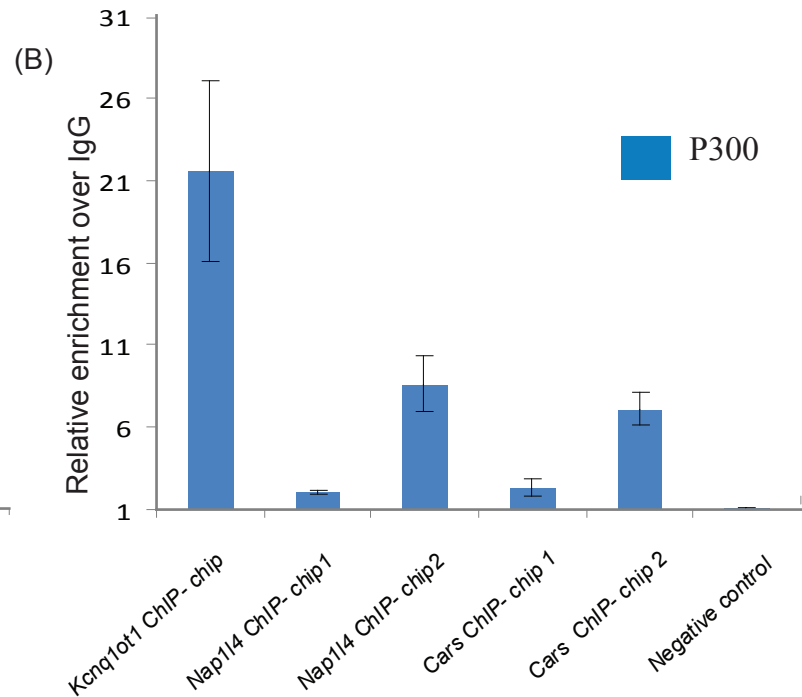

Supplement: dev079566figs4.pdf [file dev079566figs4.pdf]

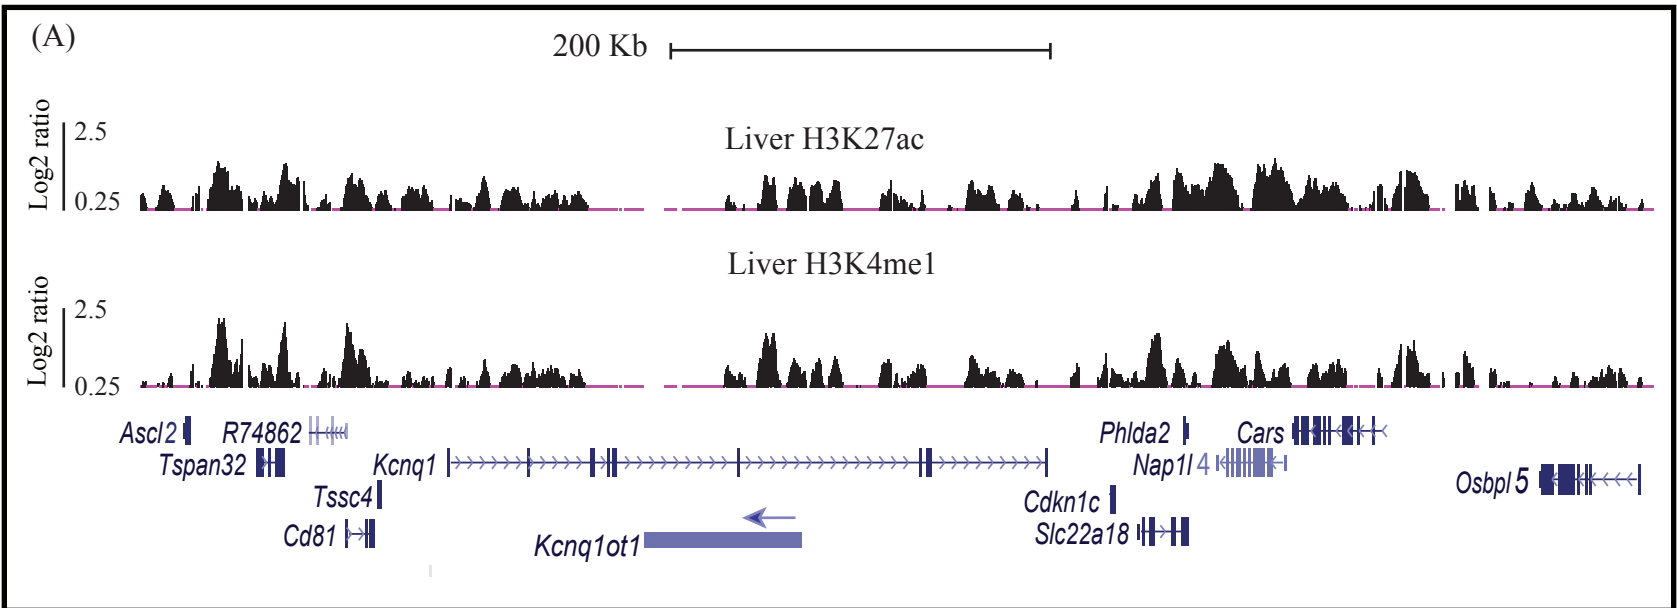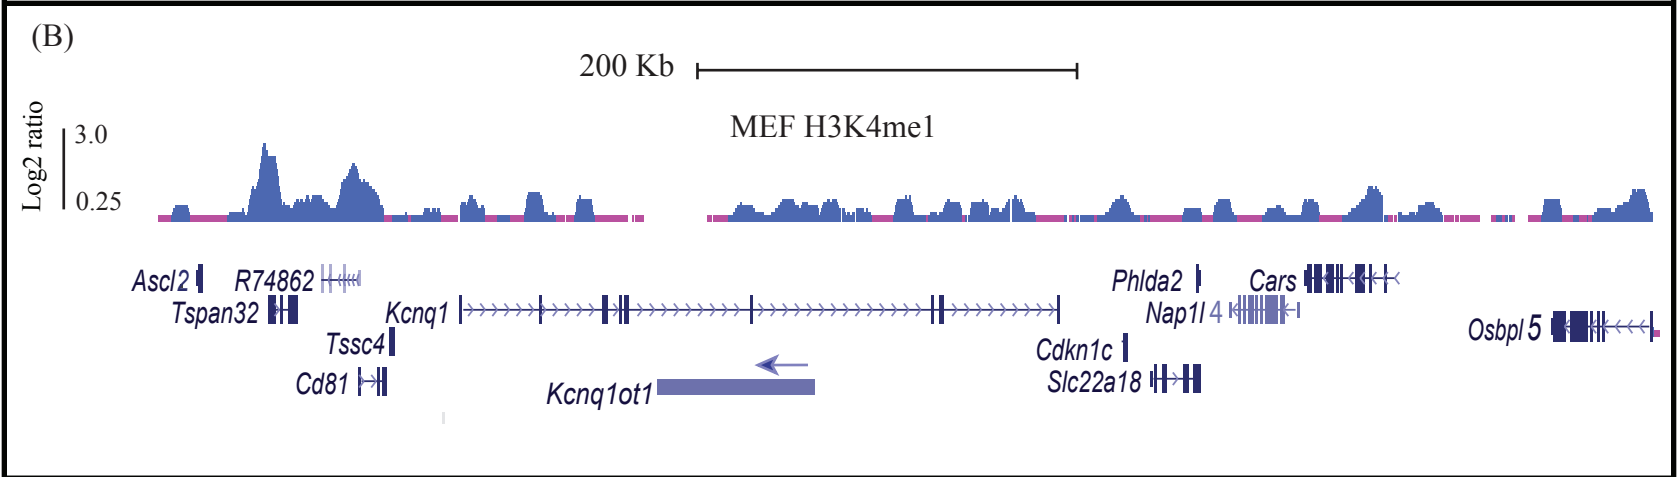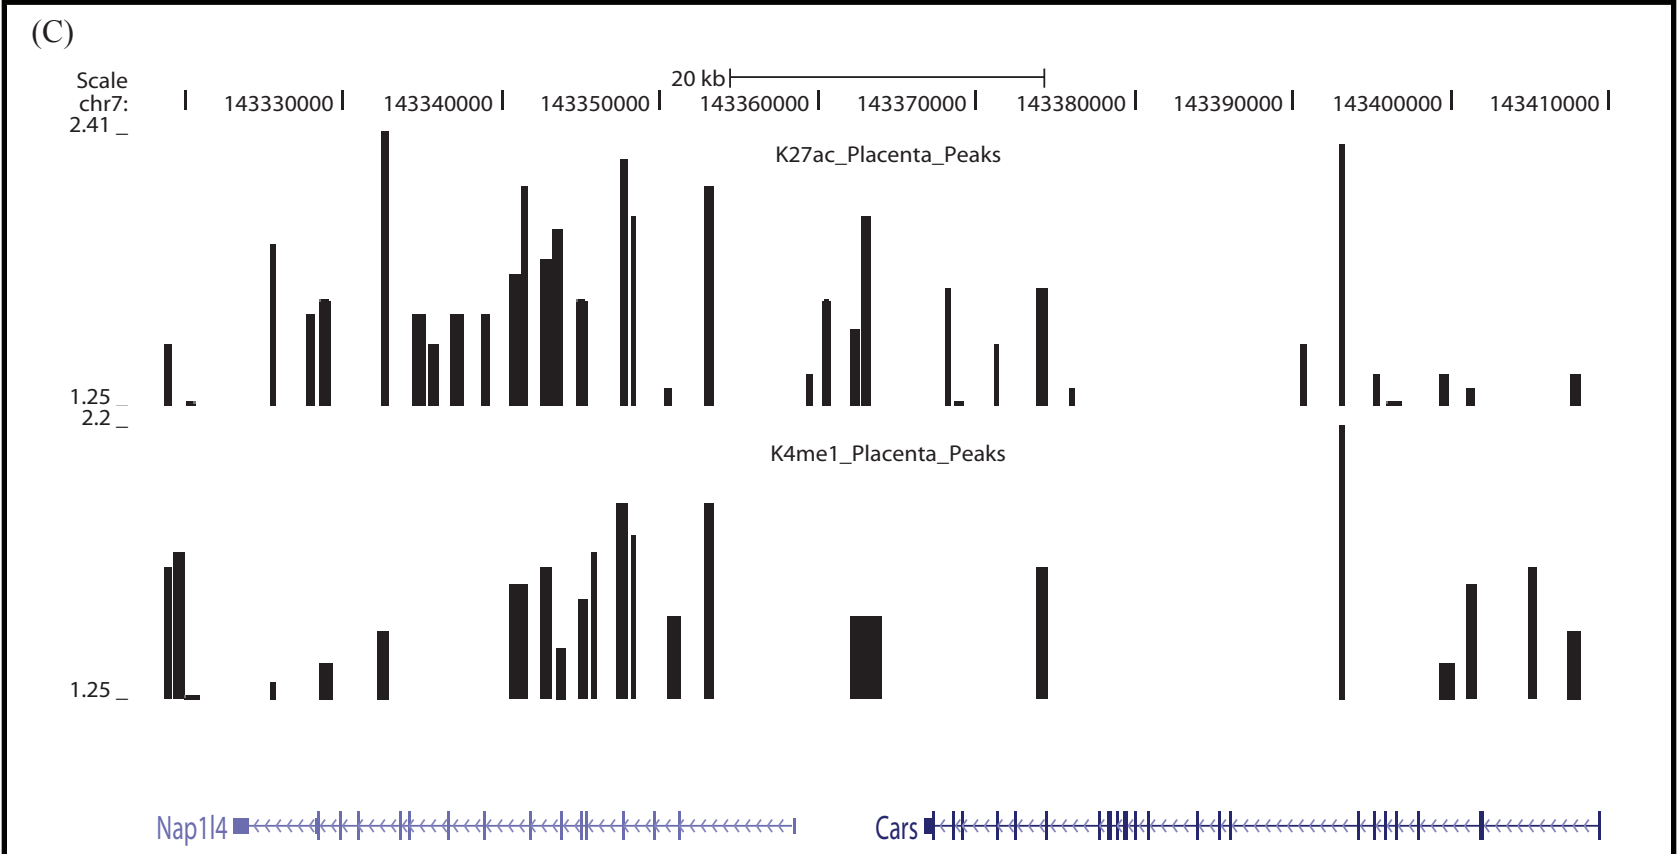

Supplement: dev079566figs5.pdf [file dev079566figs5.pdf]

(A)

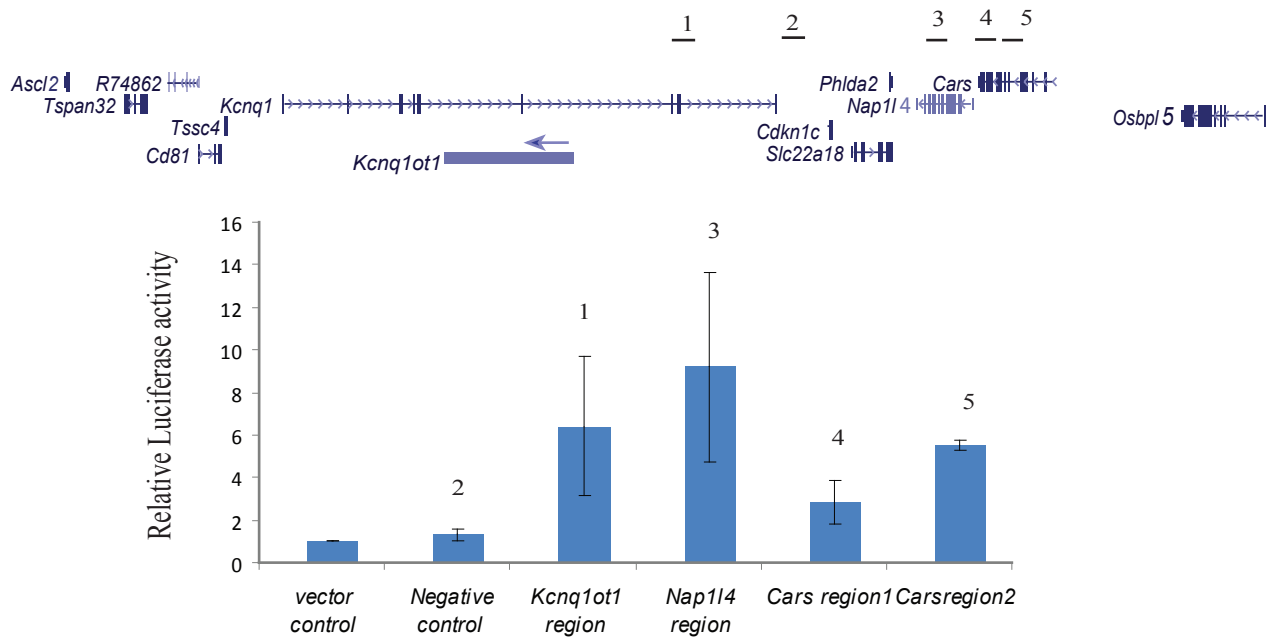

(B)

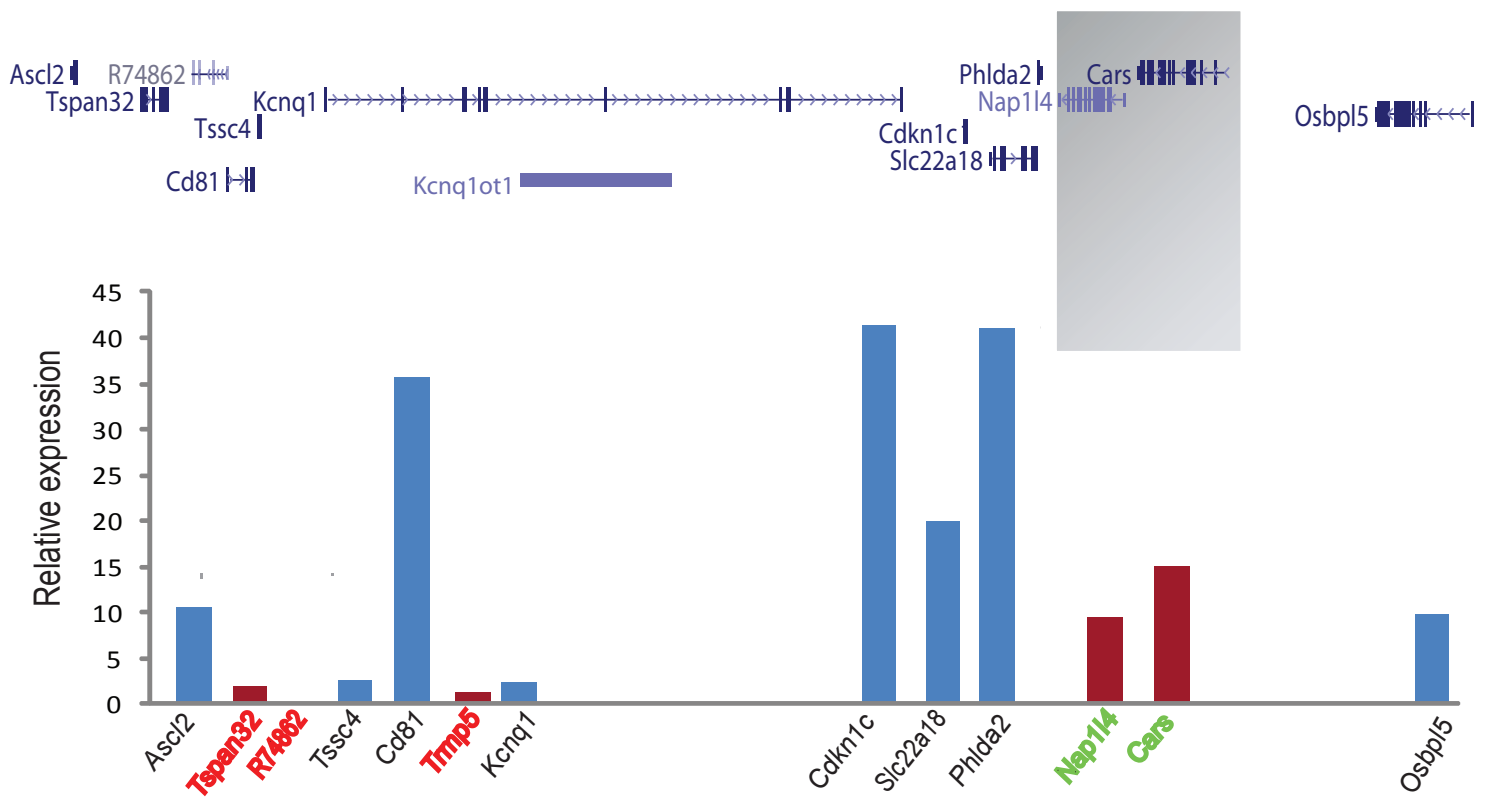

(C)

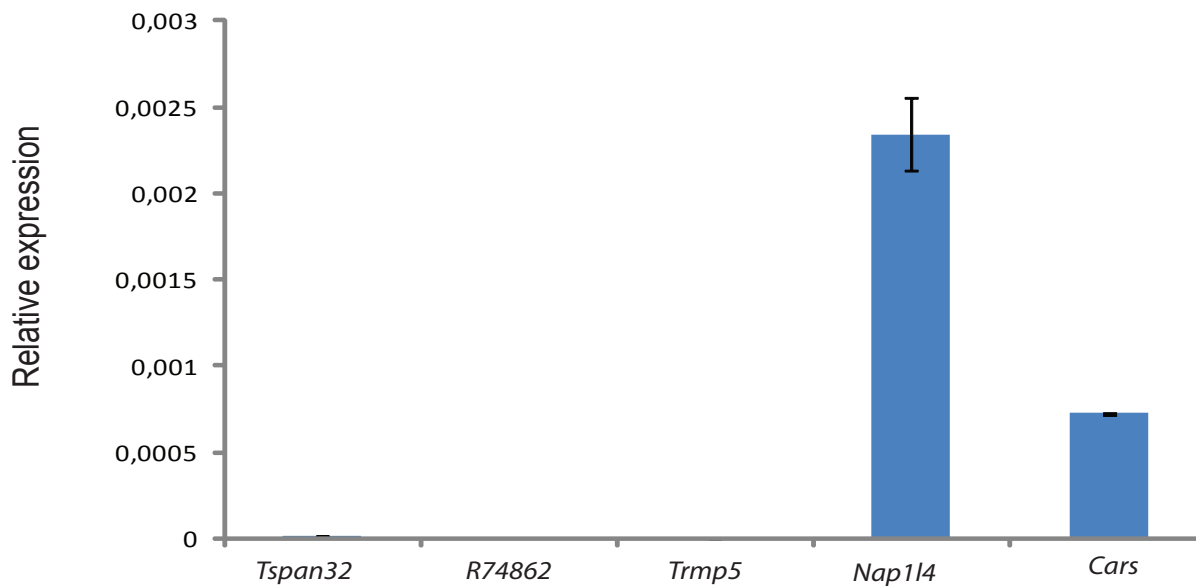

Supplement: dev079566figs6.pdf [file dev079566figs6.pdf]

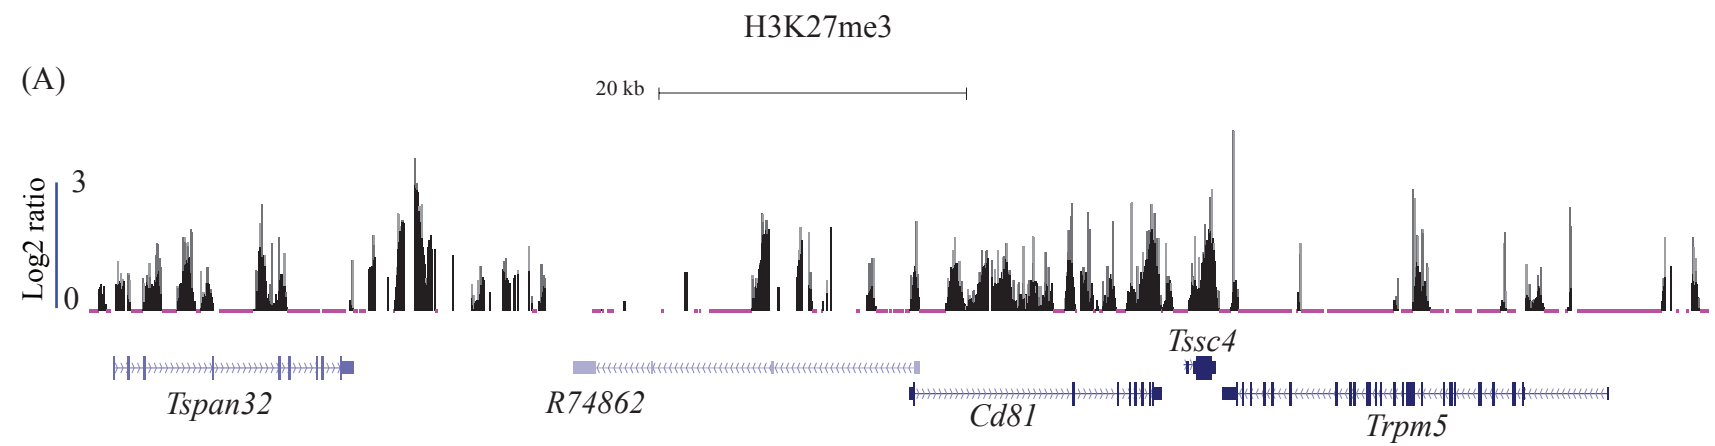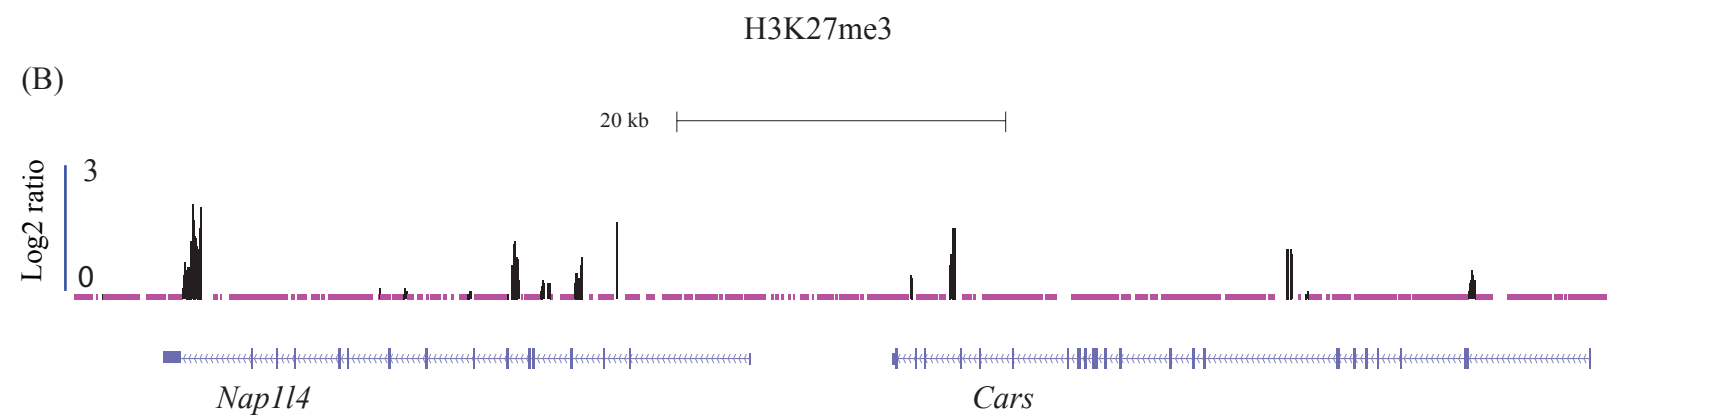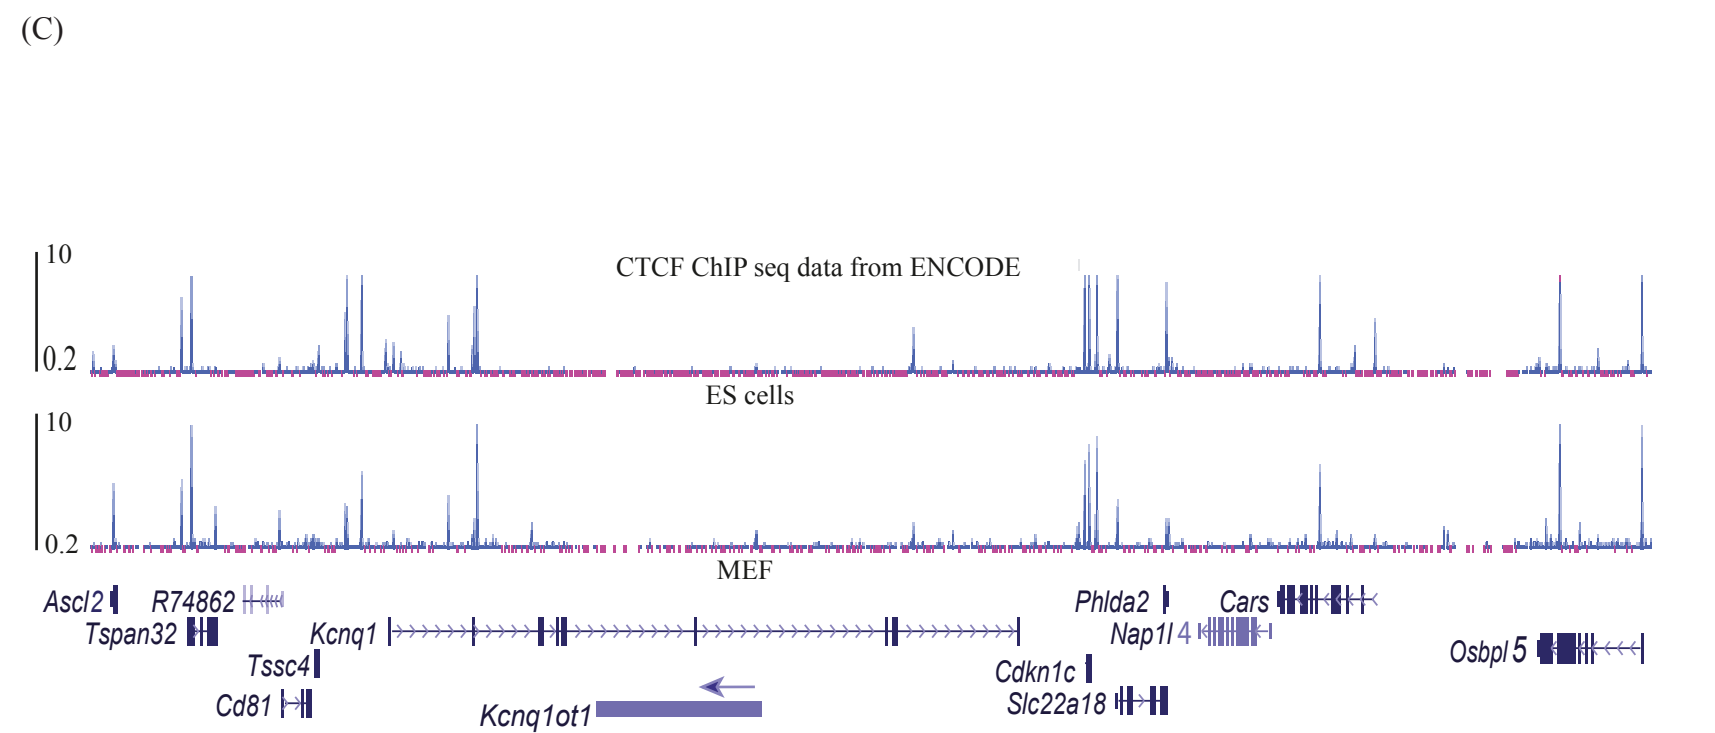

Supplement: dev079566figs7.pdf [file dev079566figs7.pdf]

Genes escape X chromosome inactivation

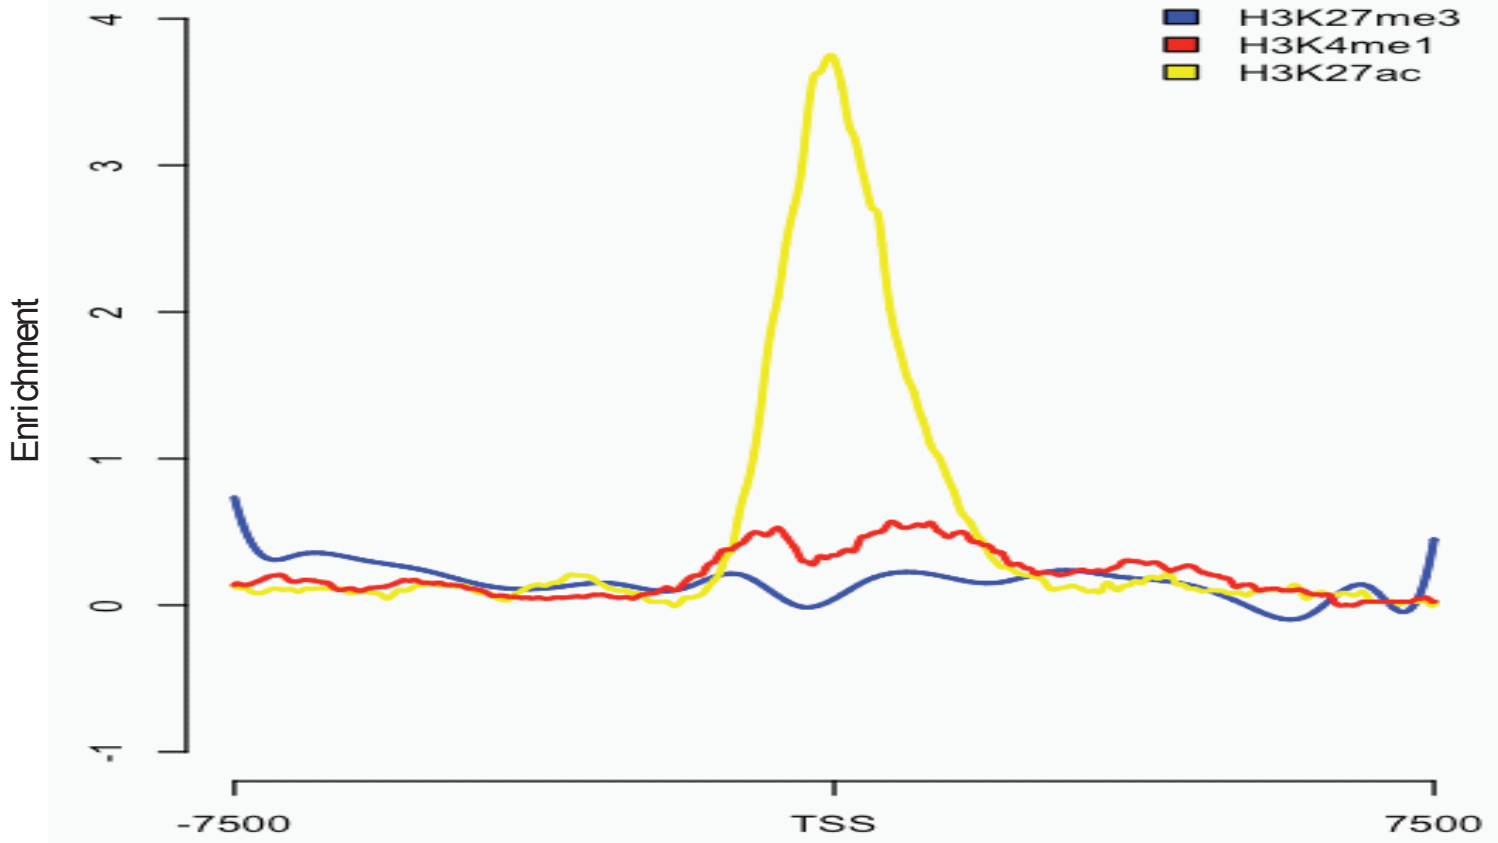

Genes undergo X chromosome inactivation

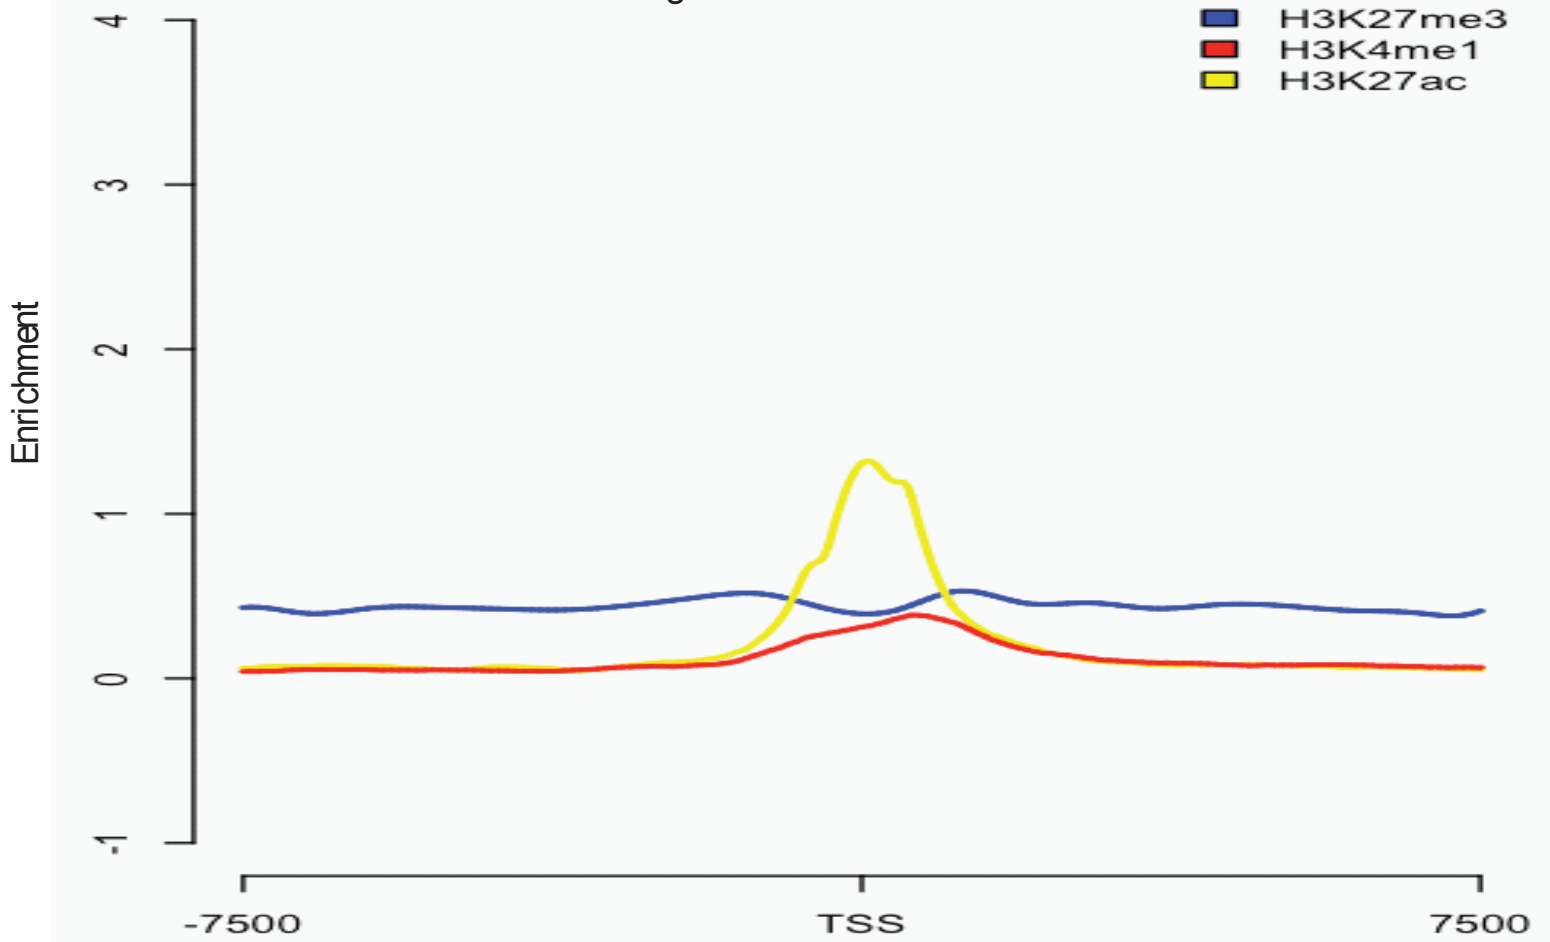

Supplement: dev079566figs8.pdf [file dev079566figs8.pdf]

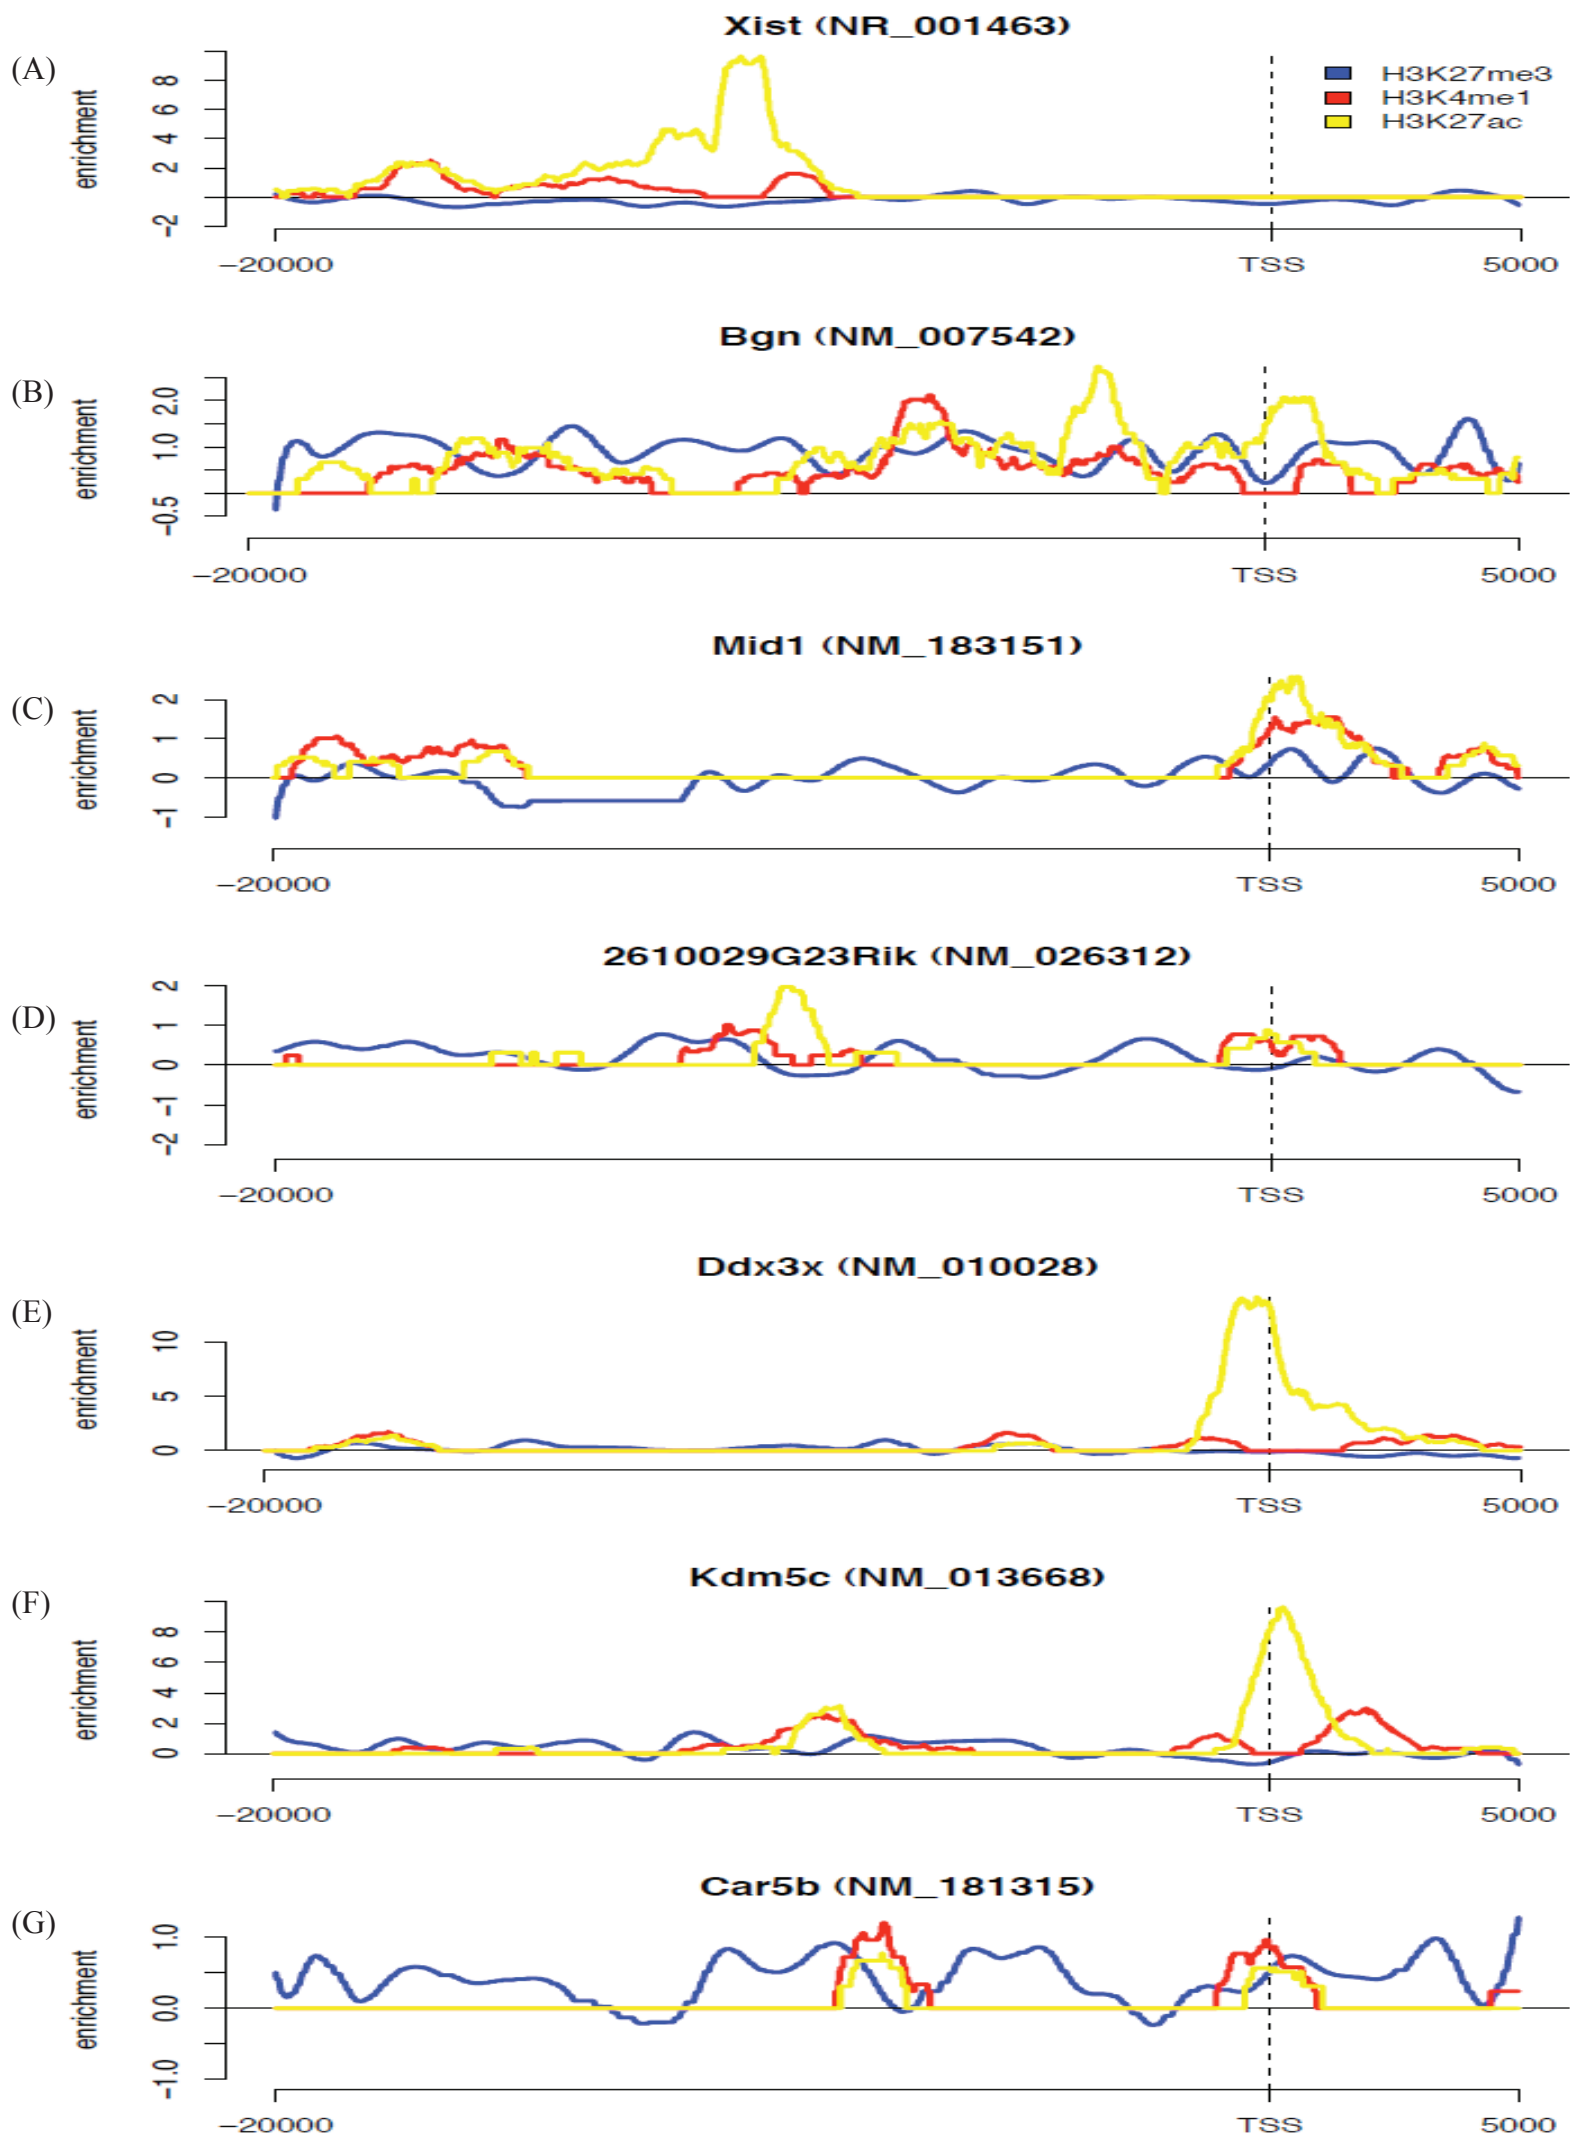

Supplement: dev079566figs9.pdf [file dev079566figs9.pdf]
